# Supplementary material
Source: publisher figshare collection journal article supplement (https://acs.figshare.com/ndownloader/files/24171559)
Supplement: Supplementary file 1 [file 24171559]

## Supporting Information

# **Pillar-Layered Metal-Organic Frameworks Based on Hexaprismane $[\text{Co}_6(\mu_3\text{-OH})_6]$ Cluster: Structural Modulation and Catalytic Performance in Aerobic Oxidation Reaction**

Xiuling Zhang,<sup>a</sup> Yong-Zheng Zhang,<sup>\*ab</sup> Yao-Qiang Jin,<sup>a</sup> Longlong Geng,<sup>a</sup> Da-Shuai Zhang,<sup>a</sup> Hui Hu,<sup>a</sup> Tingting Li,<sup>a</sup> Bin Wang,<sup>c</sup> and Jian-Rong Li<sup>\*b</sup>

<sup>a</sup>*College of Chemistry and Chemical Engineering, Dezhou University, Dezhou, 253023, P. R. China*

<sup>b</sup>*Beijing Key Laboratory for Green Catalysis and Separation, Beijing University of Technology, Beijing 100124, P. R. China*

<sup>c</sup>*Fujian Provincial Key Laboratory of Polymer Materials, College of Chemistry and Materials Science, Fujian Normal University, 32 Shangsang Road, Fuzhou 350007, PR China.*

\*E-mail: zhangyongzheng23@163.com

\*E-mail: jrli@bjut.edu.cn

## Section 1. Additional Figures

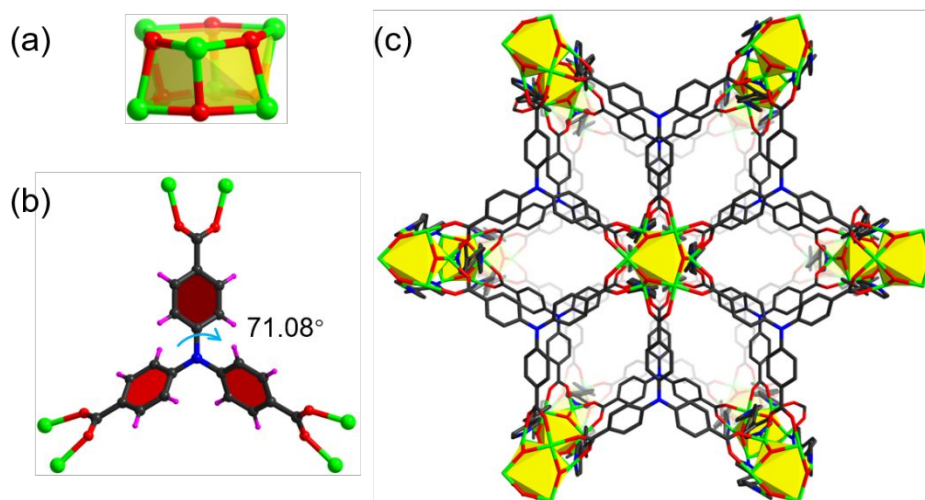

**Figure S1.** (a) The hexaprismane  $\text{Co}_6(\mu_3\text{-OH})_6$  cluster, (b) carboxylate of the  $\text{TCA}^{3-}$  ligand with  $\mu_2\text{-}\eta^1\text{:}\eta^1$  coordinating mode, and (c) 3D framework network of  $\text{Co}_6\text{-MOF-3}$  with 1D channel along the (001) direction.

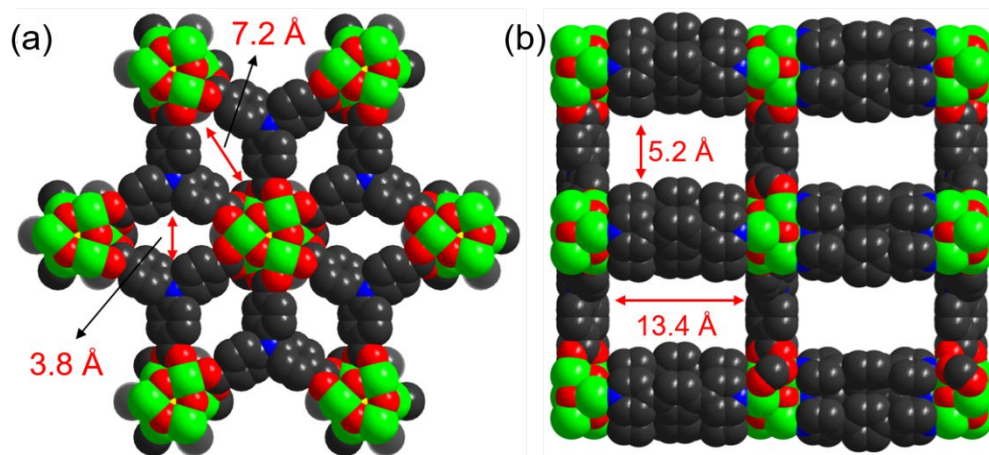

**Figure S2.** Space-filling view of 1D channels along the (a) (100), and (b) (001), directions in  $\text{Co}_6\text{-MOF-3}$ .

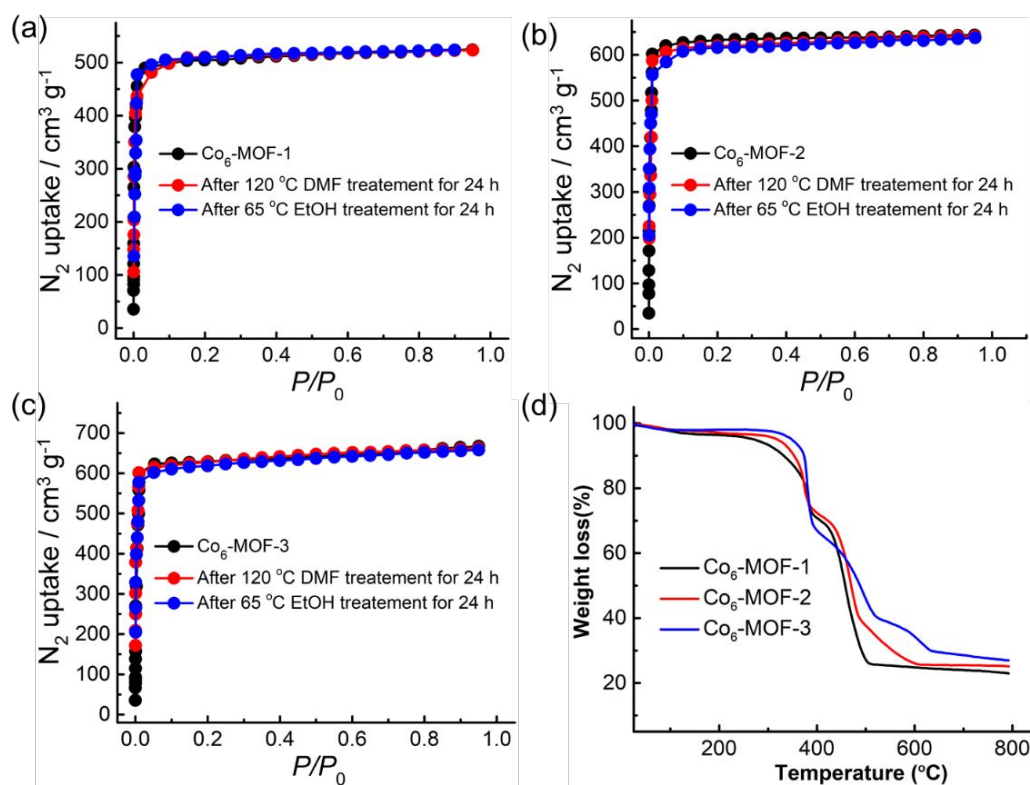

**Figure S3.**  $N_2$  adsorption isotherms at 77 K of (a)  $\text{Co}_6\text{-MOF-1}$ , (b)  $\text{Co}_6\text{-MOF-2}$ , and (c)  $\text{Co}_6\text{-MOF-3}$ , as well as their samples treated under different conditions, respectively. (d) TGA curves of three  $\text{Co}_6\text{-MOFs}$ .

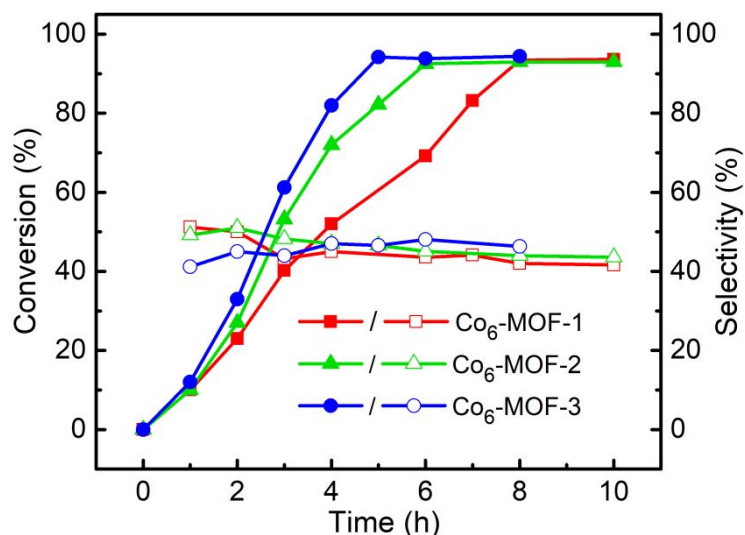

**Figure S4.** The epoxidation of styrene catalyzed by  $\text{Co}_6\text{-MOFs}$  with  $\text{O}_2$  as the oxidant source. Reaction conditions: styrene (1 mmol), DMF (10 mL), the amount of catalyst:  $[\text{Co}_6(\mu_3\text{-OH})_6]$  / substrate % = 0.37 mol%,  $T = 80\text{ }^\circ\text{C}$ ,  $\text{O}_2$  (1 atm).

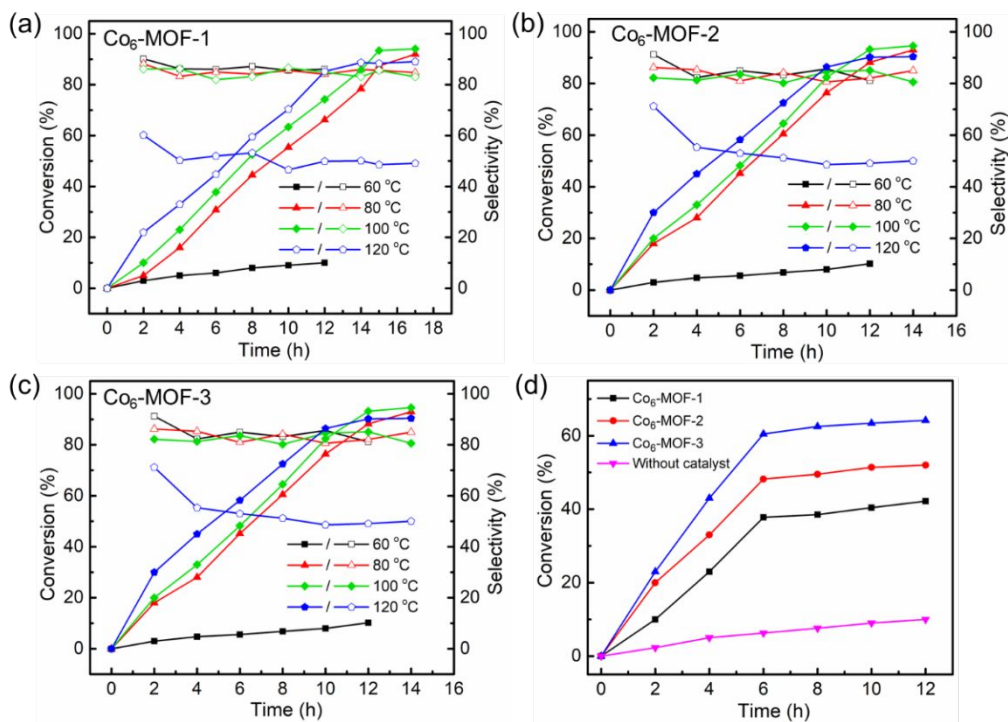

**Figure S5.** Influence of the temperature on the epoxidation of styrene catalyzed by Co<sub>6</sub>-MOFs. Reaction conditions: styrene (1 mmol), DMF (10 mL). the amount of catalyst: [Co<sub>6</sub>(μ<sub>3</sub>-OH)<sub>6</sub>] /substrate % = 0.37 mol%, Air (1 atm), (a) Co<sub>6</sub>-MOF-1 (b) Co<sub>6</sub>-MOF-2 (c) Co<sub>6</sub>-MOF-3, (d) Hot filtration test of the epoxidation of styrene catalyzed by Co<sub>6</sub>-MOFs catalysts, respectively.

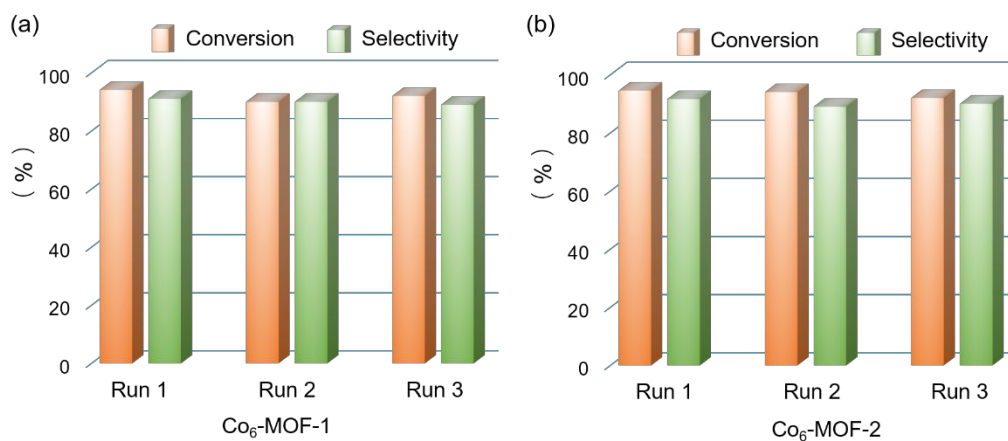

**Figure S6.** Conversion and selectivity in three cycles of styrene epoxidation catalyzed by (a) Co<sub>6</sub>-MOF-1 (b) Co<sub>6</sub>-MOF-2. Reaction conditions: styrene (3 mmol), DMF (30 mL). the amount of catalyst: [Co<sub>6</sub>(μ<sub>3</sub>-OH)<sub>6</sub>] /substrate % = 0.37 mol%, Air (1 atm), T = 100 °C.

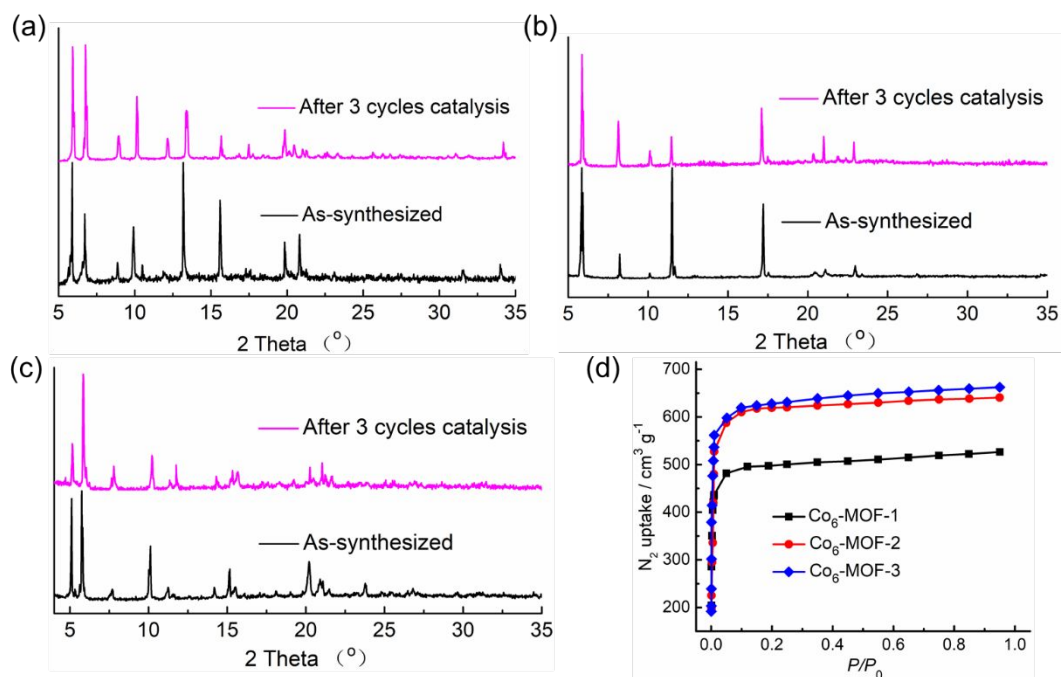

**Figure S7.** The PXRD patterns of (a) Co<sub>6</sub>-MOF-1, (b) Co<sub>6</sub>-MOF-2, and (c) Co<sub>6</sub>-MOF-3 after 3 catalytic cycles, respectively. (d) N<sub>2</sub> adsorption isotherms at 77 K of Co<sub>6</sub>-MOFs after 3 catalytic cycles, respectively.

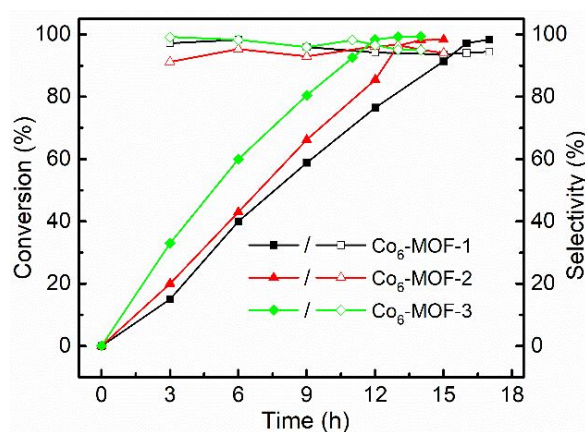

**Figure S8.** The oxidation of benzyl alcohol catalyzed by Co<sub>6</sub>-MOFs with O<sub>2</sub> as the oxidant source. Reaction conditions: benzyl alcohol (1 mmol), DMF (10 mL), the amount of catalyst: [Co<sub>6</sub>(μ<sub>3</sub>-OH)<sub>6</sub>] / substrate % = 0.43 mol%, T = 80 °C, O<sub>2</sub> (1 atm).

## Section 2. Additional Tables

**Table S1.** Crystal data and structure refinements of **Co<sub>6</sub>-MOF-1**, **-2**, and **-3**.

|                                                                                                       | Co <sub>6</sub> -MOF-1                                                        | Co <sub>6</sub> -MOF-2                                             | Co <sub>6</sub> -MOF-3                                                        |
|-------------------------------------------------------------------------------------------------------|-------------------------------------------------------------------------------|--------------------------------------------------------------------|-------------------------------------------------------------------------------|
| Empirical formula                                                                                     | C <sub>36</sub> H <sub>27</sub> N <sub>4</sub> O <sub>9</sub> Co <sub>3</sub> | C <sub>13</sub> H <sub>8</sub> N <sub>1.33</sub> O <sub>3</sub> Co | C <sub>36</sub> H <sub>33</sub> N <sub>4</sub> O <sub>9</sub> Co <sub>3</sub> |
| Formula weight                                                                                        | 836.29                                                                        | 1990.89                                                            | 843.29                                                                        |
| Temperature (K)                                                                                       | 150                                                                           | 243                                                                | 243                                                                           |
| Crystal system                                                                                        | hexagonal                                                                     | hexagonal                                                          | hexagonal                                                                     |
| Space group                                                                                           | <i>P6<sub>3</sub>/mcm</i>                                                     | <i>P6<sub>3</sub>/mcm</i>                                          | <i>P6<sub>3</sub>/mcm</i>                                                     |
| <i>a</i> (Å)                                                                                          | 17.7315 (9)                                                                   | 17.7204 (5)                                                        | 17.7496 (5)                                                                   |
| <i>c</i> (Å)                                                                                          | 26.666 (3)                                                                    | 31.2804 (11)                                                       | 35.3261 (15)                                                                  |
| Volume (Å <sup>3</sup> )                                                                              | 7260.8 (11)                                                                   | 8506.5(6)                                                          | 9638.4 (5)                                                                    |
| <i>Z</i>                                                                                              | 4                                                                             | 12                                                                 | 4                                                                             |
| D <sub>c</sub> (g cm <sup>-3</sup> )                                                                  | 0.762                                                                         | 0.679                                                              | 0.649                                                                         |
| 2θ angle range (°)                                                                                    | 4.046 to 54.99                                                                | 6.95 to 57.872                                                     | 2.65 to 54.96                                                                 |
| Absorption correction                                                                                 | Semi-empirical from equivalents                                               |                                                                    |                                                                               |
| Refinement method                                                                                     | Full-matrix least-squares on <i>F</i> <sup>2</sup>                            |                                                                    |                                                                               |
| Goodness-of-fit on <i>F</i> <sup>2</sup>                                                              | 1.071                                                                         | 1.128                                                              | 1.104                                                                         |
| <i>R</i> <sub>1</sub> <sup>a</sup> , <i>wR</i> <sub>2</sub> <sup>b</sup> [ <i>I</i> > 2σ( <i>I</i> )] | <i>R</i> <sub>1</sub> = 0.0749,<br><i>wR</i> <sub>2</sub> = 0.2392            | <i>R</i> <sub>1</sub> = 0.0921,<br><i>wR</i> <sub>2</sub> = 0.2019 | <i>R</i> <sub>1</sub> = 0.0928,<br><i>wR</i> <sub>2</sub> = 0.2593            |
| <i>R</i> <sub>1</sub> <sup>a</sup> , <i>wR</i> <sub>2</sub> <sup>b</sup> (all data)                   | <i>R</i> <sub>1</sub> = 0.0869,<br><i>wR</i> <sub>2</sub> = 0.2515            | <i>R</i> <sub>1</sub> = 0.1183,<br><i>wR</i> <sub>2</sub> = 0.3280 | <i>R</i> <sub>1</sub> = 0.1036,<br><i>wR</i> <sub>2</sub> = 0.2728            |
| Largest diff. peak and hole<br>(e/Å <sup>-3</sup> )                                                   | 1.49/-1.25                                                                    | 1.39/-0.86                                                         | 1.20/-1.21                                                                    |

$$^a R_1 = \Sigma ||F_o| - |F_c|| / \Sigma |F_o| \text{ and } ^b wR_2 = \{\Sigma [w(F_o^2 - F_c^2)^2] / \Sigma [w(F_o^2)^2]\}^{1/2}, [F_o > 4\sigma(F_o)].$$

The B level alert in Co<sub>6</sub>-MOF-1 cif and its explanation:

Alert level B

PLAT420\_ALERT\_2\_B D-H Without Acceptor O2 --H2. Please Check

The acceptor of O<sub>2</sub>--H<sub>2</sub> in Co<sub>6</sub>-MOF-1 could be attributed to the disordered guest molecule (DMA or H<sub>2</sub>O), which were treated by using the MASK routine in the Olex2 software package.

**Table S2.** Influence of the Co<sub>6</sub>-MOF catalyst on the epoxidation of styrene.

| Catalyst <sup>#</sup>  | oxidant        | Conversion (%) | Selectivity (%) | TON   | TOF (h) |
|------------------------|----------------|----------------|-----------------|-------|---------|
| Co <sub>6</sub> -MOF-1 | O <sub>2</sub> | 93.2           | 51.2            | 128.9 | 16.1    |
|                        | air            | 94.1           | 90.8            | 230.9 | 15.4    |
| Co <sub>6</sub> -MOF-2 | O <sub>2</sub> | 95.2           | 50.3            | 129.4 | 21.6    |
|                        | air            | 94.5           | 90.2            | 230.4 | 19.2    |
| Co <sub>6</sub> -MOF-3 | O <sub>2</sub> | 96.1           | 52.1            | 135.3 | 27.1    |
|                        | air            | 95.6           | 91.8            | 237.2 | 23.7    |
| blank                  | O <sub>2</sub> | 10.5           | 66.3            | —     | —       |
|                        | air            | 5.6            | 75.4            | —     | —       |

Reaction conditions: 100 °C, O<sub>2</sub> / air (1 atm), styrene (0.5 mmol), DMF (10 mL). <sup>#</sup> the amount of catalyst: [Co<sub>6</sub>(μ<sub>3</sub>-OH)<sub>6</sub>] / substrate % = 0.37 mol%

### Section 3. Conversion, Selectivity and Yield

To determine conversion, selectivity and yield, the GC was calibrated. Therefore, five standard solutions containing authentic samples of starting material (styrene) and product (styrene oxide) were prepared and measured. Calibration curves were obtained by plotting the ratio of internal standard peak area to the mass of internal standard in

the solution against the ratio of analyte peak area to the mass of analyte. The slope of the calibration lines, received by linear fit, is the response factor  $R_x$ , which takes into account the differences in the detector response between the analyte and the standard:

$$R_x = \frac{A_{is}/m_{is}}{A_x/m_x}$$

with  $A_{is}$ : peak area of the internal standard,  $A_x$ : peak area of the analyte,  $m_{is}$ : mass of the internal standard, and  $m_x$ : mass of the analyte. Masses then were calculated using the following equation:

$$m_x = \frac{m_{is}}{A_{is}} * A_x * R_x$$

Conversion, yield and selectivity were calculated as follows:

$$conversion = \left( \frac{n_0(styrene) - n_i(styrene)}{n_0(styrene)} \right) * 100$$

$$yield = \left( \frac{n(styrene\ oxide)}{n_0(styrene)} \right) * 100$$

$$selectivity = \left( \frac{yield}{conversion} \right) * 100$$

TONs were calculated using the following equation:  $TON = \frac{n(product)}{n(catalyst)}$

TOFs were calculated using the following equation:

$$TOF = \frac{TON}{reaction\ time}$$
